# Supplementary material
Source: publisher site journal article supplement (https://www.dovepress.com/article/485851)

**Pharmacokinetics and** **Bioequivalence of Two Fixed-Combination Tablets of** **Valsartan/Amlodipine (80/5 mg) in Healthy Chinese Subjects**

**Table S1.** ANOVA of Cmax, AUC0-t and AUC0-∞ after Logarithmic Transformation.

| Study | Parameters | *P*-value | | | | | |
| --- | --- | --- | --- | --- | --- | --- | --- |
| Valsartan | | | Amlodipine | | |
| LnCmax | LnAUC0-t | LnAUC0-∞ | LnCmax | LnAUC0-t | LnAUC0-∞ |
| Fasting | Administration sequence | 0.5620 | 0.5035 | 0.4832 | 0.4136 | 0.8380 | 0.9719 |
| Formulations factors | 0.4171 | 0.2510 | 0.2177 | 0.2486 | 0.4062 | 0.5121 |
| Administration period | 0.9965 | 0.8252 | 0.7972 | 0.6438 | 0.9802 | 0.9161 |
| Fed | Administration sequence | 0.5705 | 0.8502 | 0.8667 | 0.9138 | 0.8805 | 0.7409 |
| Formulations factors | 0.1289 | 0.5150 | 0.3975 | 0.3482 | 0.0105 | 0.0319 |
| Administration period | 0.0002 | <0.0001 | <0.0001 | 0.0014 | 0.0526 | 0.9862 |

**Figure S1** Average plasma concentration-time curve after a single dose of valsartan/amlodipine tablets in the fasting and fed studies (semilogarithmic scale). Fasting: valsartan **(A)** and amlodipine **(C)**; Fed: valsartan **(B)** and amlodipine **(D)**


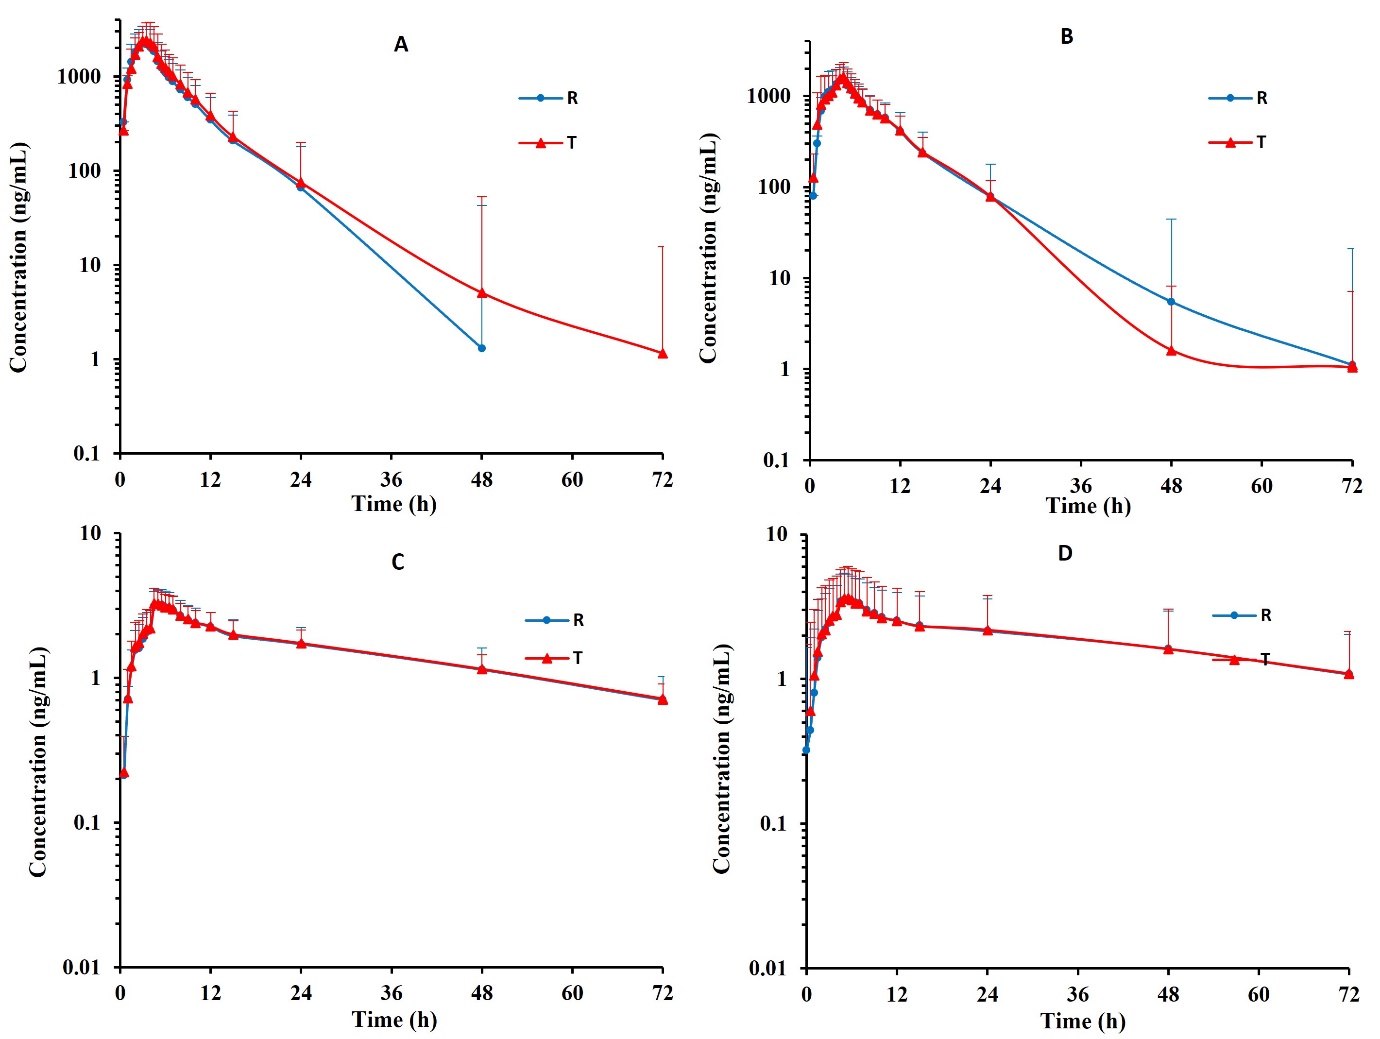

Supplement: Supplementary file 1 [file get_supplementary_file.php]
